# Supplementary material for: Performance characteristics of the VIDAS® SARS-COV-2 IgM and IgG serological assays
Source: bioRxiv or medRxiv preprint supplement (doi:10.1101/2020.09.28.20196030), 2020-11-24
Supplement: Supplementary file [file 2020.09.28.20196030-1.pdf]

## Supplemental Material

**Table S1. Demographics of pre-pandemic healthy volunteers used for the determination of VIDAS®**

**SARS-CoV-2 IgM and IgG specificity**

| <b>VIDAS® SARS-CoV-2 serology testing</b> | <b>IgM</b>  | <b>IgG</b>  | <b>Combined IgM/IgG</b> |
|-------------------------------------------|-------------|-------------|-------------------------|
| Study population, N (%)                   | 308 (100%)  | 989 (100%)  | 308 (100%)              |
| Age in years, median (range)              | 45 (18-86)  | 44 (18-86)  | 45 (18-86)              |
| Gender, N (%)                             |             |             |                         |
| Male                                      | 143 (46.4%) | 347 (35.1%) | 143 (46.4%)             |
| Female                                    | 165 (53.6%) | 642 (64.9%) | 165 (53.6%)             |
| Pre-pandemic healthy volunteers, N (%)    |             |             |                         |
| France                                    | 161 (52.3%) | 842 (85.1%) | 161 (52.3%)             |
| United States                             | 147 (47.7%) | 147 (14.9%) | 147 (47.7%)             |

**Table S2. Demographics of French patients positive for SARS-CoV-2 used for the determination of VIDAS® SARS-CoV-2 IgM and IgG sensitivity (positive percent agreement with RT-PCR positivity)**

| VIDAS® SARS-CoV-2 serology testing                           | IgM        | IgG          | Combined IgM/IgG |
|--------------------------------------------------------------|------------|--------------|------------------|
| <b>Patients with documented date of RT-PCR-positive test</b> |            |              |                  |
| Number of samples tested                                     | 234        | 253          | 232              |
| Study population, N (%)                                      | 132 (100%) | 139 (100%)   | 130 (100%)       |
| Age in years, median (range)                                 |            |              |                  |
| Non-hospitalized (N=61)                                      | missing    | missing      | missing          |
| Other (N=71/78/69)                                           | 71 (27-96) | 70.5 (27-96) | 70 (27-96)       |
| Gender, N (%)                                                |            |              |                  |
| Male                                                         | 47 (35.6%) | 53 (38.1%)   | 47 (36.2%)       |
| Female                                                       | 24 (18.2%) | 25 (18.0%)   | 22 (16.9%)       |
| Missing                                                      | 61 (46.2%) | 61 (43.9%)   | 61 (46.9%)       |
| Disease severity, N (%)                                      |            |              |                  |
| Hospitalized                                                 | 56 (42.4%) | 57 (41.0%)   | 54 (41.55%)      |
| Non-hospitalized                                             | 61 (46.2%) | 61 (43.9%)   | 61 (46.9%)       |
| Missing                                                      | 15 (11.4%) | 21 (15.1%)   | 15 (11.55%)      |
| <b>Patients with documented date of symptom onset</b>        |            |              |                  |
| Number of samples tested                                     | 108        | 113          | 105              |
| Study population, N (%)                                      | 65 (100%)  | 71 (100%)    | 63 (100%)        |
| Age in years, median (range)                                 | 70 (27-96) | 70 (27-96)   | 70 (27-96)       |
| Gender, N (%)                                                |            |              |                  |
| Male                                                         | 45 (69.2%) | 51 (71.8%)   | 45 (71.4%)       |
| Female                                                       | 20 (30.8%) | 20 (28.2%)   | 18 (28.6%)       |
| Disease severity, N (%)                                      |            |              |                  |
| Hospitalized                                                 | 50 (76.9%) | 50 (70.4%)   | 48 (76.2%)       |
| Non-hospitalized <sup>a</sup>                                | 0 (0.00%)  | 0 (0.0%)     | 0 (0.0%)         |
| Missing                                                      | 15 (23.1%) | 21 (29.6%)   | 15 (23.8%)       |

<sup>a</sup>Date of symptom onset not documented in non-hospitalized COVID-19 patients

**Table S3. Positive percent agreement (PPA) of the VIDAS® SARS-CoV-2 IgM and IgG test results according to the time from RT-PCR-positive test result (all available samples)**

| <b>VIDAS® SARS-CoV-2 serology testing</b> | <b>Time from RT-PCR-positive result</b> | <b>Median (range) time in days</b> | <b>No. samples<sup>a</sup></b> | <b>No. positive results</b> | <b>PPA</b> | <b>95% CI</b> |
|-------------------------------------------|-----------------------------------------|------------------------------------|--------------------------------|-----------------------------|------------|---------------|
| <b>IgM (N=234)<sup>b</sup></b>            | 0-7 days                                | 1.5 (0-7)                          | 112                            | 51                          | 45.5%      | 36.6-54.8%    |
|                                           | 8-15 days                               | 14 (8-15)                          | 60                             | 49                          | 81.7%      | 70.1-89.4%    |
|                                           | 16-23 days                              | 20 (16-23)                         | 38                             | 31                          | 81.6%      | 66.6-90.8%    |
|                                           | 24-31 days                              | 26 (24-28)                         | 13                             | 13                          | 100.0%     | 75.3-100.0%   |
|                                           | ≥ 32 days                               | 33 (32-65)                         | 11                             | 9                           | 81.8%      | 52.3-94.9%    |
| <b>IgG (N=253)<sup>b</sup></b>            | 0-7 days                                | 1 (0-7)                            | 115                            | 47                          | 40.9%      | 32.3-50.0%    |
|                                           | 8-15 days                               | 14 (8-15)                          | 73                             | 63                          | 86.3%      | 76.6-92.4%    |
|                                           | 16-23 days                              | 20 (16-23)                         | 41                             | 39                          | 95.1%      | 83.5-99.4%    |
|                                           | 24-31 days                              | 26 (24-28)                         | 13                             | 13                          | 100.0%     | 75.3-100.0%   |
|                                           | ≥ 32 days                               | 33 (32-65)                         | 11                             | 11                          | 100.0%     | 71.5-100.0%   |

<sup>a</sup>no more than one test result per patient per time period; <sup>b</sup>PPA (95% CI) for common samples (N=232) are shown in Table 4

**Table S4. Positive percent agreement (PPA) of the VIDAS® SARS-CoV-2 IgM and IgG test results according to the time from symptom onset (all available samples)**

| <b>VIDAS® SARS-CoV-2 serology testing</b> | <b>Time from symptom onset</b> | <b>Median (range) time in days</b> | <b>No. samples<sup>a</sup></b> | <b>No. positive results</b> | <b>PPA</b> | <b>95% CI</b> |
|-------------------------------------------|--------------------------------|------------------------------------|--------------------------------|-----------------------------|------------|---------------|
| <b>IgM (N=108)<sup>b</sup></b>            | 0-7 days                       | 6 (1-7)                            | 24                             | 9                           | 37.5%      | 21.2-57.3%    |
|                                           | 8-15 days                      | 12 (8-15)                          | 29                             | 24                          | 82.8%      | 65.5-92.4%    |
|                                           | 16-23 days                     | 18 (16-23)                         | 26                             | 26                          | 100.0%     | 86.8-100.0%   |
|                                           | 24-31 days                     | 26 (24-30)                         | 18                             | 18                          | 100.0%     | 81.5-100.0%   |
|                                           | ≥ 32 days                      | 34 (32-65)                         | 11                             | 11                          | 100.0%     | 71.5-100.0%   |
| <b>IgG (N=113)<sup>b</sup></b>            | 0-7 days                       | 5.5 (1-7)                          | 24                             | 9                           | 37.5%      | 21.2-57.3%    |
|                                           | 8-15 days                      | 12 (8-15)                          | 31                             | 25                          | 80.6%      | 63.7-90.8%    |
|                                           | 16-23 days                     | 18 (16-23)                         | 29                             | 28                          | 96.6%      | 82.2-99.9%    |
|                                           | 24-31 days                     | 26 (24-30)                         | 19                             | 18                          | 94.7%      | 75.4-99.1%    |
|                                           | ≥ 32 days                      | 35 (32-65)                         | 10                             | 10                          | 100.0%     | 69.2-100.0%   |

<sup>a</sup>no more than one test result per patient per time period; <sup>b</sup>PPA (95% CI) for common samples (N=105) are shown in Table 5

**Table S5. Positive and negative predictive values (PPV/NPV) at 5% prevalence of the VIDAS® SARS-CoV-2 IgM, IgG and combined IgM/IgG test results, according to the time from symptom onset (all available samples for IgG specificity)**

| VIDAS® SARS-CoV-2 serology testing | Time from symptom onset | PPV <sup>a</sup> (95% CI) | NPV <sup>a</sup> (95% CI) |
|------------------------------------|-------------------------|---------------------------|---------------------------|
| <b>IgM</b>                         | 0-7 days                | 72.1% (36.3-92.1%)        | 96.5% (95.4-97.4%)        |
|                                    | 8-15 days               | 87.0% (62.5-96.4%)        | 99.1% (98.0-99.6%)        |
|                                    | 16-23 days              | 89.0% (67.1-97.0%)        | 100.0% (N/A) <sup>b</sup> |
|                                    | 24-31 days              | 89.0% (67.1-97.0%)        | 100.0% (N/A) <sup>b</sup> |
|                                    | ≥ 32 days               | 89.0% (67.1-97.0%)        | 100.0% (N/A) <sup>b</sup> |
| <b>IgG</b>                         | 0-7 days                | 94.3% (68-99.2%)          | 96.5% (95.4-97.4%)        |
|                                    | 8-15 days               | 97.8% (86.3-99.7%)        | 99.3% (98.2-99.7%)        |
|                                    | 16-23 days              | 98.0% (87.6-99.7%)        | 99.8% (98.6-100.0%)       |
|                                    | 24-31 days              | 98.0% (87.4-99.7%)        | 99.7% (98.1-100.0%)       |
|                                    | ≥ 32 days               | 98.1% (88-99.7%)          | 100.0% (N/A) <sup>b</sup> |
| <b>Combined IgM/IgG</b>            | 0-7 days                | 74.7% (40-92.9%)          | 96.7% (95.6-97.6%)        |
|                                    | 8-15 days               | 87.9% (64.5-96.7%)        | 99.5% (98.4-99.8%)        |
|                                    | 16-23 days              | 89.0% (67.1-97.0%)        | 100.0% (N/A) <sup>b</sup> |
|                                    | 24-31 days              | 89.0% (67.1-97.0%)        | 100.0% (N/A) <sup>b</sup> |
|                                    | ≥ 32 days               | 89.0% (67.1-97.0%)        | 100.0% (N/A) <sup>b</sup> |

<sup>a</sup>PPV and NPV were calculated at 5% prevalence using values of sensitivity (PPA) determined on paired IgM and IgG test results (N=105; Table 5); values of specificity were those calculated on all available samples (N=308 for IgM and N=989 for IgG; Table 3); <sup>b</sup>95% CI not calculable (division by zero)
